# Supplementary material
Source: PubMed Central journal article supplement (PMC7018989)
Supplement: mmc2.pdf [file mmc2.pdf]

```

/***** gating_rev2 *****/

//===== Support from Press et al., 1992
#include <stdio.h>
#include <stdlib.h>
#include <string.h>
#include <math.h>
#include <time.h>
#define NR_END 1
#define FREE_ARG char*
#define SQR(a) ((sqrang=(a)) == 0.0 ? 0.0 : sqrang*sqrang)

void nrerror(char error_text[] /* Numerical Recipes standard error handler */){
    fprintf(stderr,"Numerical Recipes run-time error...\n");
    fprintf(stderr,"%s\n",error_text);
    fprintf(stderr,"...now exiting to system...\n");
    exit(1);
}

double *vector(long nl, long nh) /* allocate a float vector with subscript range v[nl..nh] */{
    double *v, *t;
    int i;
    v=(double *)malloc((size_t) ((nh-nl+1+NR_END)*sizeof(double)));
    if (!v) nrerror("allocation failure in vector()");
    t=v-nl+NR_END;
    for(i=nl; i<=nh; i++) t[i]=0.0;
    return v-nl+NR_END;
}

float *fvector(long nl, long nh) /* allocate a float vector with subscript range v[nl..nh] */{
    float *v, *t;
    int i;
    v=(float *)malloc((size_t) ((nh-nl+1+NR_END)*sizeof(float)));
    if (!v) nrerror("allocation failure in vector()");
    t=v-nl+NR_END;
    for(i=nl; i<=nh; i++) t[i]=0.0;
    return v-nl+NR_END;
}

long *ivector(long nl, long nh) /* allocate a int vector with subscript range v[nl..nh] */{
    long *v, *t;
    int i;
    v=(long *)malloc((size_t) ((nh-nl+1+NR_END)*sizeof(long)));
    if (!v) nrerror("allocation failure in ivector()");
    t=v-nl+NR_END;
    for(i=nl; i<=nh; i++) t[i]=0.0;
    return v-nl+NR_END;
}

double **matrix(long nrl, long nrh, long ncl, long nch) /* allocate a float matrix with subscript range
m[nr1..nrh][ncl..nch] */{
    long i, nrow=nrh-nrl+1, ncol=nch-ncl+1;
    double **m;
    int j, z;
    /* allocate pointers to rows */
    m=(double **) malloc((size_t)((nrow+NR_END)*sizeof(double*)));
    if (!m) nrerror("allocation failure 1 in matrix()");
    m += NR_END;
    m -= nrl;
    /* allocate rows and set pointers to them */
    m[nrl]=(double *) malloc((size_t)((nrow*ncol+NR_END)*sizeof(double)));
    if (!m[nrl]) nrerror("allocation failure 2 in matrix()");
    m[nrl] += NR_END;
    m[nrl] -= ncl;
    for(i=nrl+1; i<=nrh; i++) m[i]=m[i-1]+ncol;
    /* return pointer to array of pointers to rows */
    for(j=nrl; j<=nrh; j++) for(z=ncl; z<=nch; z++) m[j][z]=0.0;
    return m;
}

int **matrix(long nrl, long nrh, long ncl, long nch) /* allocate a float matrix with subscript range
m[nr1..nrh][ncl..nch] */{
    long i, nrow=nrh-nrl+1, ncol=nch-ncl+1;
    int **m;
    int j, z;

```

```

/* allocate pointers to rows */
m=(int **) malloc((size_t)((nrow+NR_END)*sizeof(int*)));
if (!m) nrerror("allocation failure 1 in matrix()");
m += NR_END;
m -= nr1;
/* allocate rows and set pointers to them */
m[nr1]=(int *) malloc((size_t)((nrow*ncol+NR_END)*sizeof(int*)));
if (!m[nr1]) nrerror("allocation failure 2 in matrix()");
m[nr1] += NR_END;
m[nr1] -= ncl;
for(i=nr1+1;i<=nrh;i++) m[i]=m[i-1]+ncol;
/* return pointer to array of pointers to rows */
for(j=nr1; j<=nrh; j++) for(z=ncl; z<=nch; z++) m[j][z]=0.0;
return m;
}

void free_vector(double *v, long n1, long nh)/* free a float vector allocated with vector() */{
    free((FREE_ARG) (v+n1-NR_END));
}

void free_fvector(float *v, long n1, long nh)/* free a float vector allocated with vector() */{
    free((FREE_ARG) (v+n1-NR_END));
}

void free_ivector(long *v, long n1, long nh)/* free a int vector allocated with vector() */{
    free((FREE_ARG) (v+n1-NR_END));
}

void free_matrix(double **m, long nr1, long nrh, long ncl, long nch)/* free a float matrix allocated by
matrix() */{
    free((FREE_ARG) (m[nr1]+ncl-NR_END));
    free((FREE_ARG) (m+nr1-NR_END));
}

void tridag(double a[], double b[], double c[], double r[], double u[], unsigned long n){
    long j;
    double bet,*gam;
    gam=vector(0,n-1);
    if (b[0] == 0.0) nrerror("Error 1 in tridag");

    u[0]=r[0]/(bet=b[0]);
    for (j=1;j<n;j++) {
        gam[j]=c[j-1]/bet;
        bet=b[j]-a[j]*gam[j];
        if (bet == 0.0) nrerror("Error 2 in tridag");
        u[j]=(r[j]-a[j]*u[j-1])/bet;
    }
    for (j=(n-2);j>=0;j--)
        u[j] -= gam[j+1]*u[j+1];
    free_vector(gam,0,n-1);
}

#define IM1 2147483563
#define IM2 2147483399
#define AM1 (1.0/IM1)
#define IMM1 (IM1-1)
#define IA1 40014
#define IA2 40692
#define IQ1 53668
#define IQ2 52774
#define IR1 12211
#define IR2 3791
#define NTAB 32
#define NDIV1 (1+IMM1/NTAB)
#define EPS 1.2e-7
#define RNMIX (1.0-EPS)

float ran2(long *idum)/*Long period (> 2 1018) random number generator of L'Ecuyer with Bays-Durham shuffle
and added safeguards. Returns a uniform random deviate between 0.0 and 1.0 (exclusive of
the endpoint values). Call with idum a negative integer to initialize; thereafter, do not alter
idum between successive deviates in a sequence. RNMIX should approximate the largest floating
value that is less than 1.*/{
    int j;

```

```

long k;
static long idum2=123456789;
static long iy=0;
static long iv[NTAB];
float temp;
if (*idum <= 0) { //Initialize.
    if (-(*idum) < 1) *idum=1; //Be sure to prevent idum = 0.
    else *idum = -(*idum);
    idum2=(*idum);
    for (j=NTAB+7;j>=0;j--) { //Load the shuffle table (after 8 warm-ups).
        k=(*idum)/IQ1;
        *idum=IA1*(idum-k*IQ1)-k*IR1;
        if (*idum < 0) *idum += IM1;
        if (j < NTAB) iv[j] = *idum;
    }
    iy=iv[0];
}
k=(*idum)/IQ1; //Start here when not initializing.
*idum=IA1*(idum-k*IQ1)-k*IR1; //Compute idum=(IA1*idum) % IM1 without
if (*idum < 0) *idum += IM1; //overflows by Schrage's method.
k=idum2/IQ2;
idum2=IA2*(idum2-k*IQ2)-k*IR2; //Compute idum2=(IA2*idum) % IM2 likewise.
if (idum2 < 0) idum2 += IM2;
j=iy/NDIV1; //Will be in the range 0..NTAB-1.
iy=iv[j]-idum2; //Here idum is shuffled, idum and idum2 are
iv[j] = *idum; //combined to generate output.
if (iy < 1) iy += IMM1;
if ((temp=AM1*iy) > RNMX) return RNMX; //Because users don't expect endpoint values.
else return temp;
}

double gasdev(long *idum)/*Returns a normally distributed deviate with zero mean and unit variance, using
ran1(idum)
as the source of uniform deviates.*/{
    double ran1(long *idum);
    static int iset=0;
    static float gset;
    double fac,rsq,v1,v2;
    if (*idum < 0) iset=0; //Reinitialize.
    if (iset == 0) { //We don't have an extra deviate handy, so
        do {
            v1=2.0*ran2(idum)-1.0; //pick two uniform numbers in the square ex
            v2=2.0*ran2(idum)-1.0; //tending from -1 to +1 in each direction,
            rsq=v1*v1+v2*v2; //see if they are in the unit circle,
        }
        while (rsq >= 1.0 || rsq == 0.0); //and if they are not, try again.
        fac=sqrt(-2.0*log(rsq)/rsq);
        /*Now make the Box-Muller transformation to get two normal deviates. Return one and
        save the other for next time.*/
        gset=v1*fac;
        iset=1;
        //Set flag.
        return v2*fac;
    }
    else { //We have an extra deviate handy,
        iset=0; //so unset the flag,
        return gset; //and return it.
    }
}

//===== end support

#define N 328
#define Npore 6
#define Lpore 0.2e-9
#define Latria 3.4e-9
#define thetaa 0.26
#define d0 1e-9
#define Pi 3.1415926535
#define Nions 2
double dt=0.01e-9;
double dtredLang=0.01e-9;
double dtred=2.0e-9;
#define F 96500.0
#define R 8.31
#define T 300.0

```



```

    fprintf(dat, "Vm=%e\n", Vm);
    fprintf(dat, "total_time=%e\n", total_time);
    fprintf(dat, "dx=%e\n", dx);
    fprintf(dat, "d1=%e\n", d1);
    fprintf(dat, "d2=%e\n", d2);
    fprintf(dat, "l1=%e\n", l1);
    fprintf(dat, "l2=%e\n", l2);
    fprintf(dat, "l3=%e\n", l3);
    fprintf(dat, "NPL=%d\n", NPL);
    fprintf(dat, "NPR=%d\n", NPR);
    fprintf(dat, "NAL=%d\n", NAL);
    fprintf(dat, "NAR=%d\n", NAR);
    fprintf(dat, "Nm13=%d\n", Nm13);
    fprintf(dat, "N13=%d\n", N13);
    fprintf(dat, "XLang=%e\n", XLang);
    for(i=0; i<Nions; i++) fprintf(dat, "zions=%e\n", zions[i]);
    for(i=0; i<Nions; i++) fprintf(dat, "C1=%e\n", C1[i]);
    for(i=0; i<Nions; i++) fprintf(dat, "C2=%e\n", C2[i]);
    fprintf(dat, "NL=%d\n", NL);
}

void build_geometry(void) {
    double temp1, temp2;
    dx=Lpore/Npore;
    d1=Lpore/2;
    d2=d1+Latria;
    l0=d1-d0*cos(thetaa)/(2.0*sin(thetaa));
    l1=l0+d0/(2.0*sin(thetaa));
    l2=l0+(d2-l0)/cos(thetaa);
    l3=d2+(d2-l0)*sin(thetaa)/cos(thetaa);
    i=N/2;
    x[i]=0.0;
    Area[i]=Pi*d0/2*d0/2;
    radius[i]=d0/2;
    i+=1;
    while((x[i-1]+dx)<=d1) {
        x[i]=x[i-1]+dx;
        radius[i]=d0/2;
        Area[i]=Area[i-1];
        Vol[i-1]=Area[i]*dx;
        i+=1;
    }
    x[i]=x[i-1]+dx;
    radius[i]=(x[i]-l0)*sin(thetaa)/cos(thetaa);
    thetaold=(thetaa)*((x[i]-d1)/(l1-d1));
    erreold=d0/(2.0*sin(thetaold));
    Area[i]=2.0*Pi*erreold*erreold*(1.0-cos(thetaold));
    Vol[i-1]=(2.0/3)*Pi*pow(erreold, 3.0)*(1.0-cos(thetaold))-
        (Pi*(d0/2)*(d0/2)*erreold*cos(thetaold)/3.0)+Pi*(d0/2)*(d0/2)*(d1-x[i-1]);
    i+=1;
    while((x[i-1]+dx)<=l1) {
        x[i]=x[i-1]+dx;
        radius[i]=(x[i]-l0)*sin(thetaa)/cos(thetaa);
        theta=(thetaa)*((x[i]-d1)/(l1-d1));
        erre=d0/(2.0*sin(theta));
        Area[i]=2.0*Pi*erre*erre*(1.0-cos(theta));
        temp1=(2.0/3)*Pi*pow(erre, 3.0)*(1.0-cos(theta))-Pi*(d0/2)*(d0/2)*erre*cos(theta)/3;
    }
    temp2=((2.0/3)*Pi*pow(erreold, 3.0)*(1.0-cos(thetaold))-Pi*(d0/2)*(d0/2)*erreold*cos(thetaold)/3);
    Vol[i-1]=temp1-temp2;
    i+=1;
    erreold=erre;
    thetaold=theta;
}
x[i]=x[i-1]+dx;
radius[i]=(x[i]-l0)*sin(thetaa)/cos(thetaa);
theta=thetaa;
erre=x[i]-l0;
Area[i]=2.0*Pi*erre*erre*(1.0-cos(theta));
temp1=(2.0/3)*Pi*pow(erre, 3.0)*(1.0-cos(theta))-Pi*(d0/2)*(d0/2)*(d1-l0)/3;
temp2=((2.0/3)*Pi*pow(erreold, 3.0)*(1.0-cos(thetaold))-
    Pi*(d0/2)*(d0/2)*erreold*cos(thetaold)/3);
Vol[i-1]=temp1-temp2;
i+=1;
erreold=erre;
thetaold=theta;
}

```

```

while((x[i-1]+dx)<=12) {
    x[i]=x[i-1]+dx;
    if(x[i]<=d2) radius[i]=(x[i]-l0)*sin(thetaa)/cos(thetaa);
    theta=(thetaa);
    erre=x[i]-l0;
    Area[i]=2.0*Pi*erre*erre*(1.0-cos(theta));
    Vol[i-1]=(2.0/3)*Pi*pow(erre,3.0)*(1.0-cos(theta))-
        (2.0/3)*Pi*pow(erreold,3.0)*(1.0-cos(thetaold));
    i+=1;
    erreold=erre;
    thetaold=theta;
}
x[i]=x[i-1]+dx;
theta=(Pi/2-thetaa)*(x[i]-12)/(13-12)+thetaa;
erre=(d2-l0)*sin(thetaa)/(cos(thetaa)*sin(theta));
Area[i]=2.0*Pi*erre*erre*(1.0-cos(theta));

Vol[i-1]=(2.0/3)*Pi*pow(erre,3.0)*(1.0-cos(theta))-Pi*pow(((d2-l0)*sin(thetaa)/cos(thetaa)),2.0)*erre*cos(theta)/3-
((2.0/3)*Pi*pow(12-l0,3.0)*(1.0-cos(thetaa))-Pi*pow(((d2-l0)*sin(thetaa)/cos(thetaa)),2.0)*((d2-l0)/3))+
(2.0/3)*Pi*pow(12-l0,3.0)*(1.0-cos(thetaa))-Pi*pow(erreold,3.0)*(1.0-cos(thetaold));
i+=1;
erreold=erre;
thetaold=theta;
double tempt;
while((x[i-1]+dx)<=13) {
    x[i]=x[i-1]+dx;
    theta=(Pi/2-thetaa)*(x[i]-12)/(13-12)+thetaa;
    erre=(d2-l0)*sin(thetaa)/(cos(thetaa)*sin(theta));
    Area[i]=2.0*Pi*erre*erre*(1.0-cos(theta));

temp1=(2.0/3)*Pi*pow(erre,3.0)*(1.0-cos(theta))-Pi*pow((d2-l0)*sin(thetaa)/cos(thetaa),2.0)*erre*cos(theta)/3;
temp2=((2.0/3)*Pi*pow(erreold,3.0)*(1.0-cos(thetaold))-Pi*pow((d2-l0)*sin(thetaa)/cos(thetaa),2.0)*erreold*cos(thetaold)/3);
    Vol[i-1]=temp1-temp2;
    i+=1;
    erreold=erre;
    thetaold=theta;
}
x[i]=x[i-1]+dx;
erre=x[i]-d2;
Area[i]=2.0*Pi*erre*erre;
Vol[i-1]=(2.0/3)*Pi*pow(erre,3.0)-((2.0/3)*Pi*pow(erreold,3.0)*(1.0-cos(thetaold))-
Pi*pow((d2-l0)*sin(thetaa)/cos(thetaa),2.0)*erreold*cos(thetaold)/3);
i+=1;
erreold=erre;
thetaold=theta;
while(x[i-1]<=4.4e-9) {
    x[i]=x[i-1]+dx;
    erre=(x[i]-d2);
    Area[i]=2.0*Pi*erre*erre;
    Vol[i-1]=(2.0/3)*Pi*(pow(erre,3.0)-pow(erreold,3.0));
    i+=1;
    erreold=erre;
    thetaold=theta;
}
while(i<=N) {
    x[i]=x[i-1]+2.0*(x[i-1]-x[i-2]);
    erre=(x[i]-d2);
    Area[i]=2.0*Pi*erre*erre;
    Vol[i-1]=(2.0/3)*Pi*(pow(erre,3.0)-pow(erreold,3.0));
    i+=1;
    erreold=erre;
    thetaold=theta;
}
for(i=N/2+1; i<=N;i++) x[N-i]=-x[i];
for(i=N/2+1; i<=N;i++) radius[N-i]=radius[i];
for(i=N/2+1; i<=N;i++) Area[N-i]=Area[i];
for(i=N/2; i<=N-1;i++) Vol[N-i-1]=Vol[i];
NPL=x_to_n(-Lpore/2);
NPR=x_to_n(Lpore/2);
NAL=x_to_n(-Lpore/2-Latria);
NAR=x_to_n(Lpore/2+Latria);
Nm13=x_to_n(-13);

```

```

        N13=x_to_n(13);
    }
void setup(void) {
    int nsigma;
    x=vector(0,N);
    Area=vector(0,N);
    Vol=vector(0,N-1);
    radius=vector(0,N);
    build_geometry();
    zions=vector(0,Nions);
    Dions=matrix(0,N-1,0,Nions);
    C1=vector(0,Nions);
    C2=vector(0,Nions);
    cs=matrix(0,Nions, 0,N-1);
    af=vector(0,N-1);
    bf=vector(0,N-1);
    cf=vector(0,N-1);
    rf=vector(0,N-1);
    a1f=matrix(0,N-1,0,Nions);
    a2f=matrix(0,N-1,0,Nions);
    c1f=matrix(0,N-1,0,Nions);
    c2f=matrix(0,N-1,0,Nions);
    zF_RT=vector(0,Nions);
    v=vector(0,N-1);
    v_old=vector(0,N-1);
    fluxes=matrix(0,N-1,0,Nions);
    current=vector(0,N-1);
    currentLang=vector(0,N-1);
    currentDispl=vector(0,N-1);
    currentTot=vector(0,N-1);
    s=vector(0,N-1);
    av=vector(0,N-1);
    bv=vector(0,N-1);
    cv=vector(0,N-1);
    rv=vector(0,N-1);
    eps=vector(0,N-1);
    zS4=vector(0,N-1);

    //Shaker; Fixed with Y coordinate of Calfa,S4 3D distances from CZ phe to charge
    xL=36e-10;
    #define NS 31
    #define Np 6
    float nS[NS]={19.256, -17.56599, -13.759, -17.36499, -11.429, 16.58, 23.757, 23.304, 30.616,
        19.989, 17.49901, 17.99701, 19.961, 17.869, 19.625, 19.45, 9.98201, -4.892, -9.89499,
        -14.248, -12.16699,
        -12.15799, -3.51, 17.17801, 20.341, 22.612, 25.787, 21.769, 18.929, 16.866, -18.5 };
    int zS[NS]={1,1,-1,-1,1,1,-1,-1,1,1,1,-1,-1,-1,-1,-1,-1,-1,1,1,1,-1,-1,-1,-1,-1,-1,-1,1 };
    float xxp[Np]={-25.4, -17.9, -8.0, -3.4, 3.4, 10.0 };
    nsigma=(int) (sigma/dx);
    for(j=0; j<NS; j++) { n1S=x_to_n(nS[j]*1e-10);
        for(i=0;i<N;i++)
    s[i]+=(1.0/sqrt(2.0*Pi*nsigma*nsigma))*exp(-1.0*(i-n1S)*(i-n1S)/(2.0*nsigma*nsigma))*zS[j];
    }
    double mup, mup2, ii,dd;
    for(j=0;j<=Np-1;j++) { mup=(double) x_to_n(xxp[j]*1e-10);
        for(i=0;i<=N-1;i++) { ii=(double) i;
    zS4[i]+=(1.0/sqrt(2.0*Pi*nsigma*nsigma))*exp(-(1.0*(mup-ii)*(mup-ii))/(2.0*nsigma*nsigma));
    }
    }
    NL=(int) (xL/dx);
    if(NL % 2==1) NL+=1;
    fL=vector(0,NL-1);
    muL=vector(0,NL-1);
    intQ=matrix(0,NL-1,0, N-1);
    intS4=matrix(0,NL-1,0, N-1);
    Qdispl=matrix(0,NL-1,0, N-1);
    voltagemuL=matrix(0,NL-1,0, N-1);
    Gel=vector(0,NL-1);
    aL=vector(0,NL-1);
    bL=vector(0,NL-1);
    cL=vector(0,NL-1);
    rL=vector(0,NL-1);
    zmeanS4=vector(0,N-1);
    aflux=matrix(0,N-1,0,Nions);

```

```

bflux=matrix(0,N-1,0,Nions);

// parameter setting
zions[0]=1.0;
zions[1]=-1.0;
for(i=0; i<Nions;i++) zF_RT[i]= F*zions[i]/(R*T);
for(i=0; i<N;i++) Dions[i][0]=2e-10;
for(i=0; i<N;i++) Dions[i][1]=2e-10;
//ioni permeabili per l'intero percorso
for(i=NPL; i<=NPR;i++) Dions[i][0]=0.0;
for(i=NPL; i<=NPR;i++) Dions[i][1]=0.0;
C1[0]=C2[0]=C1[1]=C2[1]=0.14;
for(i=0;i<=N-1;i++) for(j=0; j<Nions;j++) cs[j][i]=C1[j]-i*(C1[j]-C2[j])/(N-1);
for(i=NPL;i<=NPR-1;i++) for(j=0; j<Nions;j++) cs[j][i]=0.0;
for(i=0; i<NAL;i++) v[i]=v_old[i]=Vm;
for(i=NAL; i<=NAR;i++) v[i]=v_old[i]=Vm-Vm*(i-NAL)/(NAR-NAL);
for(i=NAR+1; i<N;i++) v[i]=v_old[i]=0.0;
fL[NL/2]=1.0;
nS4init=0;
while(zS4[nS4init]<=1e-8) nS4init++;
nS4end=N-1;
while(zS4[nS4end]<=1e-8) nS4end--;
for(i=1; i<N-1;i++) for(j=0;j<Nions;j++)
a1f[i][j]=2.0*Dions[i][j]*Area[i]*dt/((x[i+1]-x[i-1])*Vol[i]);
for(i=1; i<N-1;i++) for(j=0;j<Nions;j++)
a2f[i][j]=-zF_RT[j]*Dions[i][j]*Area[i]*dt/((x[i+1]-x[i-1])*Vol[i]);
for(i=1; i<N-1;i++) for(j=0;j<Nions;j++)
c1f[i][j]=2.0*Dions[i+1][j]*Area[i+1]*dt/((x[i+2]-x[i])*Vol[i]);
for(i=1; i<N-1;i++) for(j=0;j<Nions;j++)
c2f[i][j]=zF_RT[j]*Dions[i+1][j]*Area[i+1]*dt/((x[i+2]-x[i])*Vol[i]);
bf[0]=1.0;
cf[0]=0.0;
bf[N-1]=1.0;
af[N-1]=0.0;
for(i=0; i<N;i++) eps[i]=80.0;
for(i=NPL; i<=NPR;i++) eps[i]=4.0;
for(i=1;i<=N-1;i++) av[i]=-2.0*Area[i]*eps[i]*eps0/((x[i+1]-x[i-1])*Vol[i]);
av[N-1]=0.0;
for(i=0;i<=N-2;i++) cv[i]=-2.0*Area[i+1]*eps[i+1]*eps0/((x[i+2]-x[i])*Vol[i]);
cv[0]=0.0;
for(i=1;i<=N-2;i++) bv[i]=-(av[i]+cv[i]);
bv[0]=1.0;
bv[N-1]=1.0;
kT=kB*T;
a1L=dtred/(2.0*dx);
a2L=kT*dtred/(gamma*dx*dx);
mufact=-e0/(gamma*2.0*dx);
for(i=1;i<=NL-2;i++) bL[i]=-1.0-2.0*a2L;
for(i=1; i<N-1;i++) for(j=0;j<Nions;j++) aflux[i][j]=-1e3*Area[i]*Dions[i][j]*2/(x[i+1]-x[i-1]);
for(i=1; i<N-1;i++) for(j=0;j<Nions;j++)
bflux[i][j]=-1e3*Area[i]*Dions[i][j]*zF_RT[j]/(x[i+1]-x[i-1]);
ttime=0.0;
cumtime=0.0;
XLang=XLangold=0.0;
Langfact=sqrt(2.0*kT*dt/gamma);
Langfactred=sqrt(2.0*kT*dtredLang/gamma);
iLang=iLangold=N/2;
idum=-254;
time(&current_time);
idum=-current_time;
ieqsp=x_to_n(xeqsp)-(N/2-NL/2);
printf("\n\neqsp=%d", ieqsp);
springfact=-ksp*dx/gamma;
}

void finalize(void) {
free_vector(x,0,N);
free_vector(Area,0,N);
free_vector(Vol,0,N-1);
free_vector(radius, 0,N);
free_vector(zions,0,Nions);
free_matrix(Dions, 0,N-1,0,Nions);
free_vector(C1,0,Nions);
free_vector(C2,0,Nions);
free_matrix(cs,0,Nions, 0,N-1);
free_vector(af,0,N-1);
}

```



```

    free_vector(bf,0,N-1);
    free_vector(cf,0,N-1);
    free_vector(rf,0,N-1);
    free_matrix(a1f,0,N-1,0,Nions);
    free_matrix(a2f,0,N-1,0,Nions);
    free_matrix(c1f,0,N-1,0,Nions);
    free_matrix(c2f,0,N-1,0,Nions);
    free_vector(v,0,N-1);
    free_matrix(fluxes,0,N-1,0,Nions);
    free_vector(current,0,N-1);
    free_vector(currentLang,0,N-1);
    free_vector(s,0,N-1);
    free_vector(av,0,N-1);
    free_vector(bv,0,N-1);
    free_vector(cv,0,N-1);
    free_vector(rv,0,N-1);
    free_vector(eps,0,N-1);
    free_vector(fL,0,NL-1);
    free_vector(muL,0,NL-1);
    free_matrix(intQ,0,NL-1,0,N-1);
    free_vector(Gel,0,NL-1);
    free_vector(aL,0,NL-1);
    free_vector(bL,0,NL-1);
    free_vector(cL,0,NL-1);
    printf("\nsaving data.....");
}

void finalize_report(void) {
    if(isfreport==1) freport();
    if(isfreport==1) fclose(dat);
    if(isfreport==1) fclose(txtdat);
    if(istreport==1) fclose(tdat);
}

double show_time=1e-6;

/***** go_Lang*****/
FULL SIMULATION, without approximations
requires: assess_cs() -> assess electrolyte ion concentration profiles from Nernst-Plank equation
assess_v()-> assess the electric potential profile by considering all fixed and mobile charges of the system
assess_Lang-> moves the s4 segment in accordance with the Langevin equation
assess_Fluxes -> assess electrolyte ions fluxed from the Nernst Plank equation

*/

//assess_cs ----- required
void assess_cs(void) {
    for(j=0;j<Nions;j++) {
        for(i=1;i<N-1;i++) af[i]=a1f[i][j]+a2f[i][j]*(v[i]-v[i-1]);
        for(i=1;i<N-1;i++) cf[i]=c1f[i][j]+c2f[i][j]*(v[i+1]-v[i]);
        for(i=1;i<N-1;i++)
            bf[i]=-a1f[i][j]+a2f[i][j]*(v[i]-v[i-1])-c1f[i][j]+c2f[i][j]*(v[i+1]-v[i])-1.0;
        for(i=1;i<N-1;i++) rf[i]=-cs[j][i];
        rf[0]=C1[j];
        rf[N-1]=C2[j];

        tridag(af,bf,cf,rf,cs[j],N);
    }
}

// assess_v() ----- required
void assess_v(void) {
    double temp=0;
    for(i=0; i<N-1;i++) zmeanS4[i]=0.0;
    for(i=0; i<N-1;i++) v_old[i]=v[i];
    for(i=nS4init;i<nS4end;i++) zmeanS4[i-(N/2-iLang)]+=zS4[i];

    for(i=1;i<N-2;i++) {
        temp=0.0;
        for(j=0;j<Nions;j++) temp+=zions[j]*cs[j][i];
        rv[i]=1e3*temp*F+e0*(s[i]+zmeanS4[i])/Vol[i];
    }
    rv[0]=Vm;
    rv[N-1]=0.0;
    tridag(av,bv,cv,rv,v,N);
}

```

```

// assess_Lang() ----- required
void assess_Lang(void) {
    double muLang,dxLang;

    muLang=0.0;
    for(j=(nS4init-(N/2-iLang));j<=(nS4end-(N/2-iLang));j++) muLang+=(v[j+1]-v[j-1])*zmeanS4[j];
    muLang=muLang*mufact;
    dxLang=muLang*dt+Langfact*gasdev(&idum);
    XLang=XLangold+dxLang;

    if(XLang>xL/2) XLang=xL/2-(XLang-xL/2);
    if(XLang<-xL/2) XLang=-xL/2+(-xL/2-XLang);
    iLang=x_to_n(XLang);
    vLang=dx*(iLang-iLangold)/dt;
    XLangold=XLang;
    iLangold=iLang;
}

// assess_fluxes() ----- required
void assess_fluxes(void){
    double temp;
    for(i=1;i<=N-2;i++)
        for(j=0;j<Nions;j++)
            fluxes[i][j]=
                aflux[i][j]*(cs[j][i]-cs[j][i-1])+bflux[i][j]*(cs[j][i]+cs[j][i-1])*(v[i]-v[i-1]);
    for(i=1;i<=N-2;i++) {
        temp=0.0;
        for(j=0;j<Nions;j++) temp+=zions[j]*fluxes[i][j];
        current[i]=temp*F;
        currentLang[i]=0.5*(zmeanS4[i]/Vol[i]+zmeanS4[i-1]/Vol[i-1])*e0*vLang*Area[i];
    }
    for(i=1;i<=N-2;i++)
        currentDispl[i]=2.0*eps0*eps[i]*Area[i]*(v[i-1]-v[i]-v_old[i-1]+v_old[i])/(dt*(x[i+1]-x[i-1]));
    for(i=1;i<=N-2;i++) currentTot[i]=current[i]+currentLang[i]+currentDispl[i];
}

void go_Lang(void){
    double tempshow;
    tempshow=show_time;
    ttime=0.0;
    if(istreport==1) fprintf(tdat,
"cumtime\tv[N/2]\tXLang\tcurrent[1]\tcurrent[N-1-1]\tcharge\tcurrentLang[N/2]");
    if(istreport==1) fprintf(tdat, "\tcurrentDispl[N/2]\tcurrentTot[N/2]\n");

    while(ttime<total_time) {
        if(move_S4==1) {
            assess_Lang();
        }
        else {
            if (ttime>=t_S4) {
                XLang=dx;
                iLang=x_to_n(XLang);
                vLang=dx*(iLang-iLangold)/dt;
                XLangold=XLang;
                iLangold=iLang;
            }
        }
        assess_v();
        assess_cs();
        assess_fluxes();
        charge+=dt*(current[1]+current[N-1-1])/2.0;
        ttime+=dt;
        cumtime+=dt;
        if(ttime>=tempshow) {
            printf("\n%e\t%e", ttime, XLang);
            if(istreport==1) fprintf(tdat, "%e\t%e\t%e\t%e\t%e\t%e\t%e\t%e\t%e\t%e\n", cumtime, v[N/2],
XLang,current[1],
                current[N-1-1], charge, currentLang[N/2], currentDispl[N/2], currentTot[N/2]);
            tempshow+=show_time;
        }
    }
}

```

```

}

/*****
go_Lang_reduced*****
REDUCED MODEL SIMULATION, with approximations
requires: assess_muL() -> assess mu for each sensor position
assess_v()-> assess the electric potential profile by considering all fixed and mobile charges of the system
assess_Lang-> moves the s4 segment in accordance with the Langevin equation
assess_Fluxes -> assess electrolyte ions fluxed from the Nernst Plank equation

*/

// go_Lang_eq ----- required ----- required

void go_Lang_eq(int iL) {
    iLang=iL;
    XLang=x[iL];
    double err;
    double tempshow, show_time=1e-7;
    double *tempv;
    tempv=vector(0,N-1);
    err=1.0;
    while(err>1e-6) {
        assess_cs();
        assess_v();
        err=0.0;
        for(i=1;i<N-1;i++) tempv[i]=fabs(v_old[i]-v[i]);
        for(i=1;i<N-2;i++) if(tempv[i]>err) err=tempv[i];
    }
}

// assess_muL() ----- required
// requires go_Lang_eq() assess equilibrium for a sensor position
void assess_muL(void) {
    int imuL, ions;
    double temp, temp2, temp3;
    for(imuL=0;imuL<=NL-1;imuL++) {
        go_Lang_eq(N/2-NL/2+imuL);
        muL[imuL]=0.0;
        for(j=NAL;j<=NAR;j++) muL[imuL]+=(v[j-(NL/2-imuL)+1]-v[j-(NL/2-imuL)-1])*zS4[j];
        muL[imuL]=muL[imuL]*mufact;
        muL[imuL]+=springfact*(imuL-ieqsp);
        printf("\ni=%d, mu=%e",imuL,muL[imuL]);
        for(i=0;i<=N-1;i++) voltagemuL[imuL][i]=v[i];
        for(i=0;i<=N-1;i++) intQ[imuL][i]=0.0;
        for(ions=0; ions<Nions;ions++) {
            temp=cs[ions][NPL-1];
            temp2=Vol[NPL-1];
            intQ[imuL][NPL-1]+= zions[ions]*temp*temp2*1e3*F;
        }
        for(j=NPL-2;j>=0;j--) {
            intQ[imuL][j]=intQ[imuL][j+1];
            for(ions=0; ions<Nions;ions++)
intQ[imuL][j]+=zions[ions]*cs[ions][j]*Vol[j]*1e3*F;
        }
        for(ions=0; ions<Nions;ions++) {
            temp=cs[ions][NPR+1];
            temp2=Vol[NPR+1];
            intQ[imuL][NPR+1]-= zions[ions]*temp*temp2*1e3*F;
        }
        for(j=NPR+2;j<=N-1;j++) {
            intQ[imuL][j]=intQ[imuL][j-1];
            for(ions=0; ions<Nions;ions++)
intQ[imuL][j]-=zions[ions]*cs[ions][j]*Vol[j]*1e3*F;
        }
        for(i=0;i<=N-1;i++) intS4[imuL][i]=0.0;
        intS4[imuL][N-1]=zmeanS4[N-1]*e0;
        for(j=N-2;j>=0; j--) intS4[imuL][j]=intS4[imuL][j+1]+zmeanS4[j]*e0;
        for(i=1;i<=N-2;i++) Qdispl[imuL][i]=2.0*eps[i]*eps0*Area[i]*(v[i-1]-v[i])/(x[i+1]-x[i-1]);
        Gel[imuL]=0.0;
        for(j=NAL;j<=NAR;j++) Gel[imuL]+=v[j-(NL/2-imuL])*zS4[j]*e0;
    }
}

// assess_Lang_reduced() ----- required

```

```

void assess_Lang_reduced(void) {
    double dxLang;
    dxLang=mul[-(N/2-NL/2)+iLang]*dtredLang+Langfactred*gasdev(&idum);
    XLang=XLangold+dxLang;
    if(XLang>xL/2) XLang=xL/2-(XLang-xL/2);
    if(XLang<-xL/2) XLang=-xL/2+(-xL/2-XLang);
    iLang=x_to_n(XLang);
    vLang=dx*(iLang-iLangold)/dtredLang;
    iLangold=iLang;
    XLangold=XLang;
}

void go_Lang_reduced(void) {
    double IgoldL, Igl, IgoldR, Igr, *Q,*Qold, *Qdd, *Qddold,*QS4, *QS4old;
    double tempshow;
    tempshow=show_time;
    Qold=vector(0,N-1);
    Q=vector(0,N-1);
    Qdd=vector(0,N-1);
    Qddold=vector(0,N-1);
    QS4old=vector(0,N-1);
    QS4=vector(0,N-1);
    ttime=0.0;
    assess_mul();
    XLang=XLangold=0.0;
    iLang=iLangold=x_to_n(XLang);
    for(i=0;i<=N-1;i++) Qold[i]=intQ[-(N/2-NL/2)+iLang][i];
    for(i=0;i<=N-1;i++) Qddold[i]=Qdispl[-(N/2-NL/2)+iLang][i];
    for(i=0;i<=N-1;i++) QS4old[i]=intS4[-(N/2-NL/2)+iLang][i];
    if(istreport==1) fprintf(tdat, "cumtime\tcurrent[1]\tcurrent[N-1-1]\tcharge\n");
    while(ttime<total_time) {
        if(move_S4==1) {
            assess_Lang_reduced();
        }
        else {
            if (ttime>=t_S4) {
                XLang=dx;
                iLang=x_to_n(XLang);
            }
            ttime+=dtredLang;
            cumtime+=dtredLang;
            for(i=0;i<=N-1;i++) Q[i]=intQ[-(N/2-NL/2)+iLang][i];
            for(i=0;i<=N-1;i++) Qdd[i]=Qdispl[-(N/2-NL/2)+iLang][i];
            for(i=0;i<=N-1;i++) QS4[i]=intS4[-(N/2-NL/2)+iLang][i];
            //assess ionic currents
            for(i=0;i<=N-1;i++) current[i]=(Q[i]-Qold[i])/dtred;
            for(i=0;i<=N-1;i++) currentLang[i]=(QS4[i]-QS4old[i])/dtred;
            for(i=0;i<=N-1;i++) currentDispl[i]=(Qdd[i]-Qddold[i])/dtred;
            chargeL+=Q[0]-Qold[0];
            Igl=current[0];
            chargeR+=Q[N-1]-Qold[N-1];
            Igr=current[N-1];
            for(i=1;i<=N-2;i++) currentTot[i]=current[i]+currentLang[i]+currentDispl[i];
            for(i=0;i<=N-1;i++) Qold[i]=Q[i];
            for(i=0;i<=N-1;i++) Qddold[i]=Qdd[i];
            for(i=0;i<=N-1;i++) QS4old[i]=QS4[i];
            if(ttime>=tempshow) {
                if(istreport==1) fprintf(tdat, "%e\t%e\t%e\n", cumtime, current[1], current[N-1-1]);
                tempshow+=show_time;
            }
        }
    }
}

void assess_FP(void) {
    double tempL;
    for(i=1;i<=NL-2;i++) aL[i]=a1L*mul[i-1]+a2L;
    for(i=1;i<=NL-2;i++) cL[i]=-a1L*mul[i+1]+a2L;
    for(i=0;i<=NL-1;i++) rL[i]=-fL[i];
    tempL=-1.0+mul[NL-1]*a1L-a2L;
    bL[NL-1]=tempL;
    aL[NL-1]=mul[NL-2]*a1L+a2L;
    bL[0]=-1.0-mul[0]*a1L-a2L;
    cL[0]=-mul[1]*a1L+a2L;
    tridag(aL,bL,cL,rL,fL,NL);
    tempL=0.0;
}

```

```

        for(i=0;i<=NL-1;i++) tempL+=fL[i];
        if(tempL<1.0) printf("\n\nWarning!! fL<1\n");
    }

int assess_mul_tag=1;

void go_FP(void) {
    double tempshow, IgoldL, IgL, IgoldR, IgR, *Q,*Qold, *QS4,*QS4old, xmean, Fmean, Qpore, *Qdd, *Qddold;
    tempshow=show_time;
    ttime=0.0;
    Q=vector(0,N-1);
    Qold=vector(0,N-1);
    QS4=vector(0,N-1);
    QS4old=vector(0,N-1);
    Qdd=vector(0,N-1);
    Qddold=vector(0,N-1);
    for(j=0;j<N;j++) Qold[j]=0;
    for(j=0;j<N;j++) QS4old[j]=0;
    for(j=0;j<N;j++) Qddold[j]=0;
    if(assess_mul_tag==1) assess_mul();
    for(j=0;j<N;j++) for(i=0;i<NL;i++) Qold[j]+=intQ[i][j]*fL[i];
    for(j=0;j<N;j++) for(i=0;i<NL;i++) QS4old[j]+=intS4[i][j]*fL[i];
    for(j=0;j<N;j++) for(i=0;i<NL;i++) Qddold[j]+=Qdispl[i][j]*fL[i];
    while(ttime<total_time) {
        assess_FP();
        ttime+=dtred;
        cumtime+=dtred;
        if(ttime>=tempshow) {
            if(assess_all_curr==1) {
                for(j=0;j<N;j++) Q[j]=0;
                for(j=0;j<N;j++) QS4[j]=0;
                for(j=0;j<N;j++) Qdd[j]=0;
                for(j=0;j<N;j++) for(i=0;i<NL;i++) Q[j]+=intQ[i][j]*fL[i];
                for(j=0;j<N;j++) for(i=0;i<NL;i++) QS4[j]+=intS4[i][j]*fL[i];
                for(j=0;j<N;j++) for(i=0;i<NL;i++) Qdd[j]+=Qdispl[i][j]*fL[i];
                for(i=0;i<=N-1;i++) current[i]=(Q[i]-Qold[i])/show_time;
                for(i=0;i<=N-1;i++) currentLang[i]=(QS4[i]-QS4old[i])/show_time;
                for(i=0;i<=N-1;i++) currentDispl[i]=(Qdd[i]-Qddold[i])/show_time;
                for(i=1;i<=N-2;i++) currentTot[i]=current[i]+currentLang[i]+currentDispl[i];
                chargeL+=Q[0]-Qold[0];
                chargeR+=Q[N-1]-Qold[N-1];
                for(i=0;i<=N-1;i++) Qold[i]=Q[i];
                for(i=0;i<=N-1;i++) QS4old[i]=QS4[i];
                for(i=0;i<=N-1;i++) Qddold[i]=Qdd[i];
                xmean=0.0;
                for(i=0;i<NL;i++) xmean+=(-xL/2+dx*i+dx/2)*fL[i];
                Fmean=0.0;
                for(i=0;i<NL;i++) Fmean+=muL[i]*fL[i]*gamma;
                Qpore=0.0;
                for(i=0;i<NL;i++) {
                    for(j=NPL; j<=NPR;j++) Qpore+=zS4[j+(NL/2-i)]*fL[i];
                    if(istreport==1) fprintf(tdat, "%e\t%e\t%e\t%e\t%e\t%e\t%e\t%e\t%e\n",
cumtime, fL[NL-1], current[0]*1e12,
                                current[N-1]*1e12, chargeL/e0, chargeR/e0, xmean, Fmean,Qpore);
                }
            }
            else {
                Q[0]=0;
                Q[N-1]=0;
                for(i=0;i<NL;i++) Q[0]+=intQ[i][0]*fL[i];
                for(i=0;i<NL;i++) Q[N-1]+=intQ[i][N-1]*fL[i];
                current[0]=(Q[0]-Qold[0])/show_time;
                current[N-1]=(Q[N-1]-Qold[N-1])/show_time;
                chargeL+=Q[0]-Qold[0];
                chargeR+=Q[N-1]-Qold[N-1];
                Qold[0]=Q[0];
                Qold[N-1]=Q[N-1];
                if(istreport==1) fprintf(tdat, "%e\t%e\n", cumtime, current[0]*1e12);
            }
            tempshow+=show_time;
        }
    }
}

void go_FP_eq(void) {
    double tempshow, IgoldL, IgL, Igold, QL,QoldL, show_time_old;

```

```

show_time_old=show_time;
show_time=1e-4;
tempshow=show_time;
ttime=0.0;
if(assess_mul_tag==1) assess_mul();
QoldL=0.0;
for(i=0;i<NL;i++) QoldL+=intQ[i][0]*fL[i];
IgL=1.0;
while(fabs(IgL)>1e-18) {
    assess_FP();
    ttime+=dtred;
    if(ttime>=tempshow) {
        QL=0.0;
        for(i=0;i<NL;i++) QL+=intQ[i][0]*fL[i];
        IgL=(QL-QoldL)/show_time;
        QoldL=QL;
        printf("\n%e\t%e", ttime, fabs(IgL));
        tempshow+=show_time;
    }
}
charge=chargeL=chargeR=0.0;
show_time=show_time_old;
}

```

```

void compute_QV(void) {
    int iQV, i;
    double *vtemp, *fLtemp, Vp=-0.13, Vh=-0.14;
    double *muLVh;
    muLVh=vector(0,NL-1);
    FILE *QV;
    QV=fopen("F://TEMP//Boltzmann.asc", "w");
    Vm=Vh;
    assess_mul();
    for(i=0; i<NL; i++) muLVh[i]=muL[i];
    for(iQV=1; iQV<=11; iQV++) {
        charge=0.0;
        Vp+=0.01;
        fprintf(tdat, "VP=%e\n", Vp);
        Vm=Vh;
        assess_mul_tag=0;
        go_FP_eq();
        total_time=0.5e-3;
        show_time=10e-6;
        go_FP();
        fprintf(QV, "%e\t%e", Vp, chargeL/e0);
        Vm=Vp;
        total_time=40e-3;
        show_time=10e-6;
        assess_mul_tag=1;
        go_FP();
        fprintf(QV, "\t%e\t", chargeL/e0);
        printf("\nVm=%e\tcharge=%e\n", Vm, chargeL/e0);
        Vm=Vh;
        for(i=0; i<NL; i++) muL[i]=muLVh[i];
        total_time=40e-3;
        show_time=10e-6;
        assess_mul_tag=0;
        go_FP();
        fprintf(QV, "%e\n", chargeL/e0);
    }
    fclose(QV);
}

```

```

void compute_ColeMoore(void) {
    int iQV, i;
    double *vtemp, *fLtemp, Vp=-0.06, Vh=-0.14;
    double *muLVh, *muLm20;
    muLVh=vector(0,NL-1);
    muLm20=vector(0,NL-1);
    FILE *QV;
    QV=fopen("D://TEMP//Boltzmann.asc", "w");
    Vm=-0.02;
    assess_mul();
    for(i=0; i<NL; i++) muLm20[i]=muL[i];
    Vm=Vh;
    assess_mul();
}

```

```

for(i=0; i<NL; i++) muLVh[i]=muL[i];
for(iQV=1; iQV<=1; iQV++) {
    charge=0.0;
    Vp+=0.01;
    fprintf(tdat, "VP=%e\n", Vp);
    Vm=Vh;
    assess_mul_tag=0;
    for(i=0; i<NL; i++) muL[i]=muLVh[i];
    go_FP_eq();
    total_time=0.5e-3;
    show_time=10e-6;
    go_FP();
    fprintf(QV, "%e\t%", Vp, chargeL/e0);
    Vm=Vp;
    total_time=5e-3;
    show_time=10e-6;
    assess_mul_tag=1;
    go_FP();
    fprintf(QV, "\t%\t", chargeL/e0);
    printf("\nVm=%e\tcharge=%e\n", Vm, chargeL/e0);
    Vm=-0.02;
    for(i=0; i<NL; i++) muL[i]=muLm20[i];
    total_time=10e-3;
    show_time=10e-6;
    assess_mul_tag=0;
    go_FP();
    fprintf(QV, "%e\n", chargeL/e0);
}
fclose(QV);
}

```

```

void main(void) {
    printf("Hello!!");
    setup();
    printf("\nelectrode distance=%e", x[0]);
    printf("\nl3=%e", l3);
    isfreport=1;
    istreport=1;
    setup_report();
    assess_all_curr=0;
    Vm=-0.19;
    go_FP_eq();
    Vm=-0.19;
    total_time=1e-3;
    show_time=5e-6;
    go_FP();
    Vm=-0.04;
    total_time=15e-3;
    show_time=5e-6;
    go_FP();
    finalize_report();
    finalize();
}

```
